# Supplementary material for: Association between Weight Status and Mental Health among Korean Adolescents: A Nationwide Cross-Sectional Study
Source: MDPI journal article supplement (doi:10.3390/children10040620), 2023-03-25
Supplement: s1 [file s1]

**Supplementary Table S1.** Unadjusted association between characteristics of participants and mental health conditions

|                                      | Depressed mood         |                   |                        |                   | Perceived stress       |                   |                        |                   | Suicidal ideation      |                   |                        |                   |
|--------------------------------------|------------------------|-------------------|------------------------|-------------------|------------------------|-------------------|------------------------|-------------------|------------------------|-------------------|------------------------|-------------------|
|                                      | Male                   |                   | Female                 |                   | Male                   |                   | Female                 |                   | Male                   |                   | Female                 |                   |
|                                      | Crude OR<br>(95% CI)   | <i>p</i><br>value |
| <b>Age (years)</b>                   | 1.134<br>(1.036-1.242) | <b>0.006</b>      | 1.183<br>(1.094-1.279) | <b>&lt;0.001</b>  | 1.060<br>(1.005-1.118) | <b>0.032</b>      | 1.124<br>(1.066-1.184) | <b>&lt;0.001</b>  | 1.067<br>(0.971-1.173) | 0.176             | 1.067<br>(0.989-1.150) | 0.093             |
| <b>Total calorie intake (kcal/d)</b> | 1.000<br>(1.000-1.000) | 0.537             | 1.000<br>(1.000-1.000) | 0.198             | 1.000<br>(1.000-1.000) | 0.546             | 1.000<br>(1.000-1.000) | 0.942             | 1.000<br>(1.000-1.000) | 0.967             | 1.000<br>(1.000-1.000) | 0.208             |
| <b>Body mass index</b>               |                        |                   |                        |                   |                        |                   |                        |                   |                        |                   |                        |                   |
| Underweight                          | 1.306<br>(0.755-2.259) | 0.340             | 1.115<br>(0.643-1.936) | 0.698             | 0.911<br>(0.629-1.320) | 0.623             | 1.283<br>(0.867-1.899) | 0.213             | 1.436<br>(0.726-2.838) | 0.298             | 0.681<br>(0.324-1.435) | 0.313             |
| Normal                               | 1.000                  |                   | 1.000                  |                   | 1.000                  |                   | 1.000                  |                   | 1.000                  |                   | 1.000                  |                   |
| Overweight                           | 1.381<br>(0.805-2.370) | 0.241             | 1.406<br>(0.879-2.250) | 0.155             | 1.148<br>(0.797-1.653) | 0.457             | 1.264<br>(0.891-1.795) | 0.189             | 1.332<br>(0.717-2.475) | 0.363             | 1.402<br>(0.816-2.411) | 0.221             |
| Obesity                              | 1.161<br>(0.644-2.095) | 0.619             | 1.009<br>(0.618-1.648) | 0.971             | 1.292<br>(0.950-1.756) | 0.102             | 1.386<br>(1.009-1.904) | <b>0.044</b>      | 1.345<br>(0.716-2.527) | 0.357             | 1.080<br>(0.678-1.719) | 0.746             |
| <b>Intention to control weight</b>   |                        |                   |                        |                   |                        |                   |                        |                   |                        |                   |                        |                   |
| No                                   | 1.000                  |                   | 1.000                  |                   | 1.000                  |                   | 1.000                  |                   | 1.000                  |                   | 1.000                  |                   |
| Yes                                  | 1.179<br>(0.854-1.629) | 0.316             | 1.563<br>(1.116-2.190) | <b>0.009</b>      | 1.239<br>(1.004-1.529) | <b>0.046</b>      | 1.797<br>(1.426-2.265) | <b>&lt;0.001</b>  | 1.049<br>(0.684-1.610) | 0.826             | 1.968<br>(1.313-2.949) | <b>0.001</b>      |
| <b>Perceived health status</b>       |                        |                   |                        |                   |                        |                   |                        |                   |                        |                   |                        |                   |
| Very good/ Good                      | 0.946<br>(0.636-1.406) | 0.782             | 0.679<br>(0.474-0.974) | <b>0.035</b>      | 0.583<br>(0.459-0.739) | <b>&lt;0.001</b>  | 0.450<br>(0.357-0.566) | <b>&lt;0.001</b>  | 0.667<br>(0.426-1.047) | 0.078             | 0.802<br>(0.545-1.180) | 0.262             |
| Fair                                 | 1.000                  |                   | 1.000                  |                   | 1.000                  |                   | 1.000                  |                   | 1.000                  |                   | 1.000                  |                   |
| Very bad/ Bad                        | 3.155<br>(1.676-5.940) | <b>&lt;0.001</b>  | 3.087<br>(1.760-5.415) | <b>&lt;0.001</b>  | 2.714<br>(1.783-4.131) | <b>&lt;0.001</b>  | 2.773<br>(1.777-4.326) | <b>&lt;0.001</b>  | 4.033<br>(2.114-7.694) | <b>&lt;0.001</b>  | 4.479<br>(2.700-7.430) | <b>&lt;0.001</b>  |
| <b>Household income</b>              |                        |                   |                        |                   |                        |                   |                        |                   |                        |                   |                        |                   |
| High                                 | 0.853<br>(0.577-1.261) | 0.426             | 0.901<br>(0.636-1.277) | 0.559             | 0.976<br>(0.764-1.248) | 0.847             | 1.017<br>(0.810-1.277) | 0.885             | 1.469<br>(0.920-2.346) | 0.107             | 0.925<br>(0.637-1.344) | 0.683             |
| Middle                               | 1.000                  |                   | 1.000                  |                   | 1.000                  |                   | 1.000                  |                   | 1.000                  |                   | 1.000                  |                   |
| Low                                  | 0.867<br>(0.484-1.554) | 0.632             | 1.205<br>(0.761-1.908) | 0.427             | 0.897<br>(0.606-1.328) | 0.588             | 0.922<br>(0.665-1.279) | 0.628             | 1.452<br>(0.681-3.095) | 0.334             | 1.509<br>(0.951-2.395) | 0.081             |
| <b>Area of residency</b>             |                        |                   |                        |                   |                        |                   |                        |                   |                        |                   |                        |                   |
| Urban area                           | 1.000                  |                   | 1.000                  |                   | 1.000                  |                   | 1.000                  |                   | 1.000                  |                   | 1.000                  |                   |
| Rural area                           | 1.309<br>(0.821-2.086) | 0.257             | 0.855<br>(0.589-1.242) | 0.411             | 0.869<br>(0.654-1.156) | 0.335             | 0.851<br>(0.650-1.115) | 0.241             | 0.886<br>(0.479-1.640) | 0.700             | 0.756<br>(0.468-1.221) | 0.252             |

The value was presented as odds ratios (OR) and 95% confidence interval (CI). Significant results are shown in bold.
